# Supplementary material for: Using Community Health Workers and a Smartphone Application to Improve Diabetes Control in Rural Guatemala
Source: PubMed Central journal article supplement (PMC7784066; doi:10.9745/ghsp-d-20-00076), 2020-12-23
Supplement: 20-00076-Duffy-Supplement.pdf [file 20-00076-Duffy-Supplement.pdf]

**Supplement to:** Duffy S, Norton D, Kelly M, et al. Using community health workers and a smartphone application to improve diabetes control in rural Guatemala. *Glob Health Sci Pract.* 2020;8(4). <https://doi.org/10.9745/GHSP-D-20-00076>

**Supplemental Table 1 – GAMM results (linear elements)**

| Outcome                          | Covariate                      | Estimate        | Std. Error     | t value      | p value         |
|----------------------------------|--------------------------------|-----------------|----------------|--------------|-----------------|
| A1C (%)                          | Male                           | -0.362          | 0.478          | -0.758       | 0.449           |
|                                  | <b>Age (years)</b>             | <b>-0.0456</b>  | <b>0.0146</b>  | <b>-3.12</b> | <b>0.00199</b>  |
|                                  | <b>diabetes diagnosis</b>      | <b>0.0731</b>   | <b>0.0315</b>  | <b>2.32</b>  | <b>0.0209</b>   |
| Glucose (natural-log ml/dl)      | Male                           | -0.132          | 0.0829         | -1.59        | 0.112           |
|                                  | <b>Age (years)</b>             | <b>-0.00756</b> | <b>0.00251</b> | <b>-3.01</b> | <b>0.00271</b>  |
|                                  | <b>diabetes diagnosis</b>      | <b>0.0181</b>   | <b>0.00544</b> | <b>3.33</b>  | <b>0.000919</b> |
|                                  | <b>Fasting</b>                 | <b>-0.416</b>   | <b>0.0261</b>  | <b>-16</b>   | <b>1.03E-50</b> |
| Systolic BP (mmHg)               | Male                           | -1.7            | 3.9            | -0.437       | 0.663           |
|                                  | <b>Age (years)</b>             | <b>0.569</b>    | <b>0.116</b>   | <b>4.9</b>   | <b>1.12E-06</b> |
|                                  | Years since diabetes diagnosis | 0.2             | 0.257          | 0.777        | 0.437           |
| Diastolic BP (mmHg)              | Male                           | 0.996           | 1.8            | 0.553        | 0.58            |
|                                  | Age (years)                    | 0.00393         | 0.0537         | 0.0733       | 0.942           |
|                                  | Years since diabetes diagnosis | 0.0038          | 0.119          | 0.0318       | 0.975           |
| Weight (lbs)                     | Male                           | 8.63            | 6.3            | 1.37         | 0.171           |
|                                  | Age (years)                    | -0.264          | 0.183          | -1.44        | 0.15            |
|                                  | Years since diabetes diagnosis | 0.11            | 0.418          | 0.262        | 0.793           |
| Waist-circumference (cm)         | Male                           | -0.423          | 2.14           | -0.197       | 0.844           |
|                                  | Age (years)                    | 0.105           | 0.0633         | 1.66         | 0.0973          |
|                                  | Years since diabetes diagnosis | -0.114          | 0.142          | -0.805       | 0.421           |
| BMI (kg/m <sup>2</sup> )         | Male                           | -2.14           | 1.28           | -1.67        | 0.0957          |
|                                  | Age (years)                    | 0.0161          | 0.0373         | 0.432        | 0.666           |
|                                  | Years since diabetes diagnosis | -0.0299         | 0.085          | -0.353       | 0.725           |
| Outcome                          | Covariate                      | OR estimate     | OR 95% LCL     | OR 95% UCL   | p value         |
| A1C control (A1C <= 8%)          | Male                           | 1.68            | 0.63           | 4.46         | 0.301           |
|                                  | <b>Age (years)</b>             | <b>1.05</b>     | <b>1.01</b>    | <b>1.08</b>  | <b>0.00454</b>  |
|                                  | <b>diabetes diagnosis</b>      | <b>0.896</b>    | <b>0.829</b>   | <b>0.968</b> | <b>0.00526</b>  |
| A1C goal (A1C <= subject's goal) | Male                           | 3.11            | 0.94           | 10.3         | 0.063           |
|                                  | <b>Age (years)</b>             | <b>1.08</b>     | <b>1.03</b>    | <b>1.12</b>  | <b>0.000475</b> |
|                                  | <b>diabetes diagnosis</b>      | <b>0.889</b>    | <b>0.802</b>   | <b>0.986</b> | <b>0.0253</b>   |

**Supplement to:** Duffy S, Norton D, Kelly M, et al. Using community health workers and a smartphone application to improve diabetes control in rural Guatemala. *Glob Health Sci Pract.* 2020;8(4). <https://doi.org/10.9745/GHSP-D-20-00076>

**Supplemental Table 2 – GAMM results (non-linear elements)**

| <b>Outcome</b>                     | <b>EDF</b>  | <b>F</b>          | <b>p-value</b>  |
|------------------------------------|-------------|-------------------|-----------------|
| <b>A1C (%)</b>                     | <b>4.09</b> | <b>8.1</b>        | <b>2.80E-06</b> |
| <b>Glucose (natural-log ml/dl)</b> | <b>4.58</b> | <b>4.23</b>       | <b>0.00206</b>  |
| Systolic BP (mmHg)                 | 1           | 2.83              | 0.0926          |
| Diastolic BP (mmHg)                | 2.02        | 1.08              | 0.349           |
| <b>Weight (lbs)</b>                | <b>4.39</b> | <b>6.47</b>       | <b>2.54E-05</b> |
| Waist-circumference (cm)           | 2.07        | 1.77              | 0.151           |
| <b>BMI (kg/m<sup>2</sup>)</b>      | <b>3.63</b> | <b>5.8</b>        | <b>0.000224</b> |
| <b>Outcome</b>                     | <b>EDF</b>  | <b>Chi-square</b> | <b>p-value</b>  |
| A1C control (A1C ≤ 8%)             | 2.63        | 10.1              | 0.0676          |
| A1C goal (A1C ≤ subject's goal)    | 2.28        | 6.07              | 0.118           |

EDF: effective degrees of freedom of the estimated non-linear function
